# Supplementary material for: One novel 3-D vanadoborate with unusual 3-D Na–O–Na network
Source: Royal Society of Chemistry journal article supplement (doi:10.1039/c2ra21635c), 2012-01-01
Supplement: c2ra21635c.pdf [file c2ra21635c.pdf]

Supporting Information for

**One novel 3-D vanadoborate with unusual 3-D Na-O-Na network**

Jian Zhou, Xing Liu, Feilong Hu, Huahong Zou, Rong Li, and Xiaojuan Li

Table S1 Ranges of some important bond lengths (Å) and angles (°) for **1**.

|        |                      |       |                       |
|--------|----------------------|-------|-----------------------|
| V-O    | 1.6201(10)-2.0184(8) | B-O   | 1.3546(17)-1.5230(16) |
| Na-O   | 2.265(3)-2.8427(13)  |       |                       |
| O-V-O  | 77.65(4)-147.00(3)   | O-B-O | 106.17(8)-123.39(11)  |
| O-Na-O | 54.21(3)-172.55(3)   |       |                       |

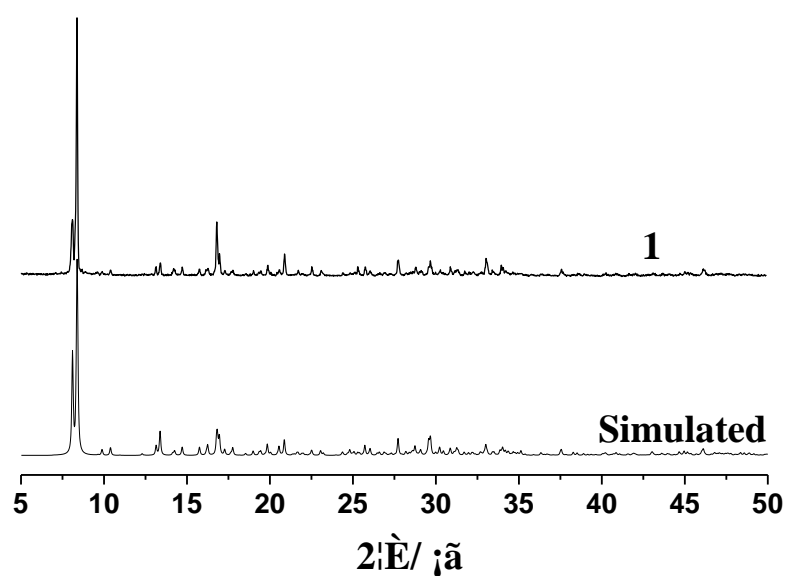

Fig.S1. Simulated and experimental powder XRD patterns of **1**.

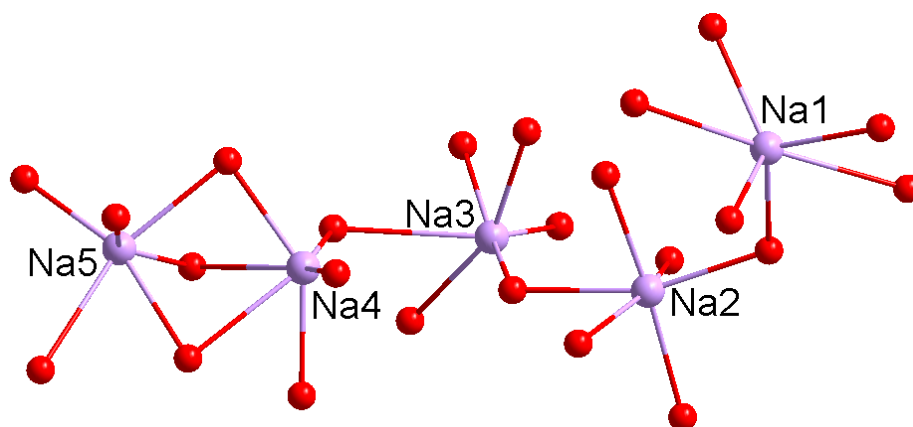

Fig. S2. The coordination environment of Na1, Na2, Na3, and Na4 ions.

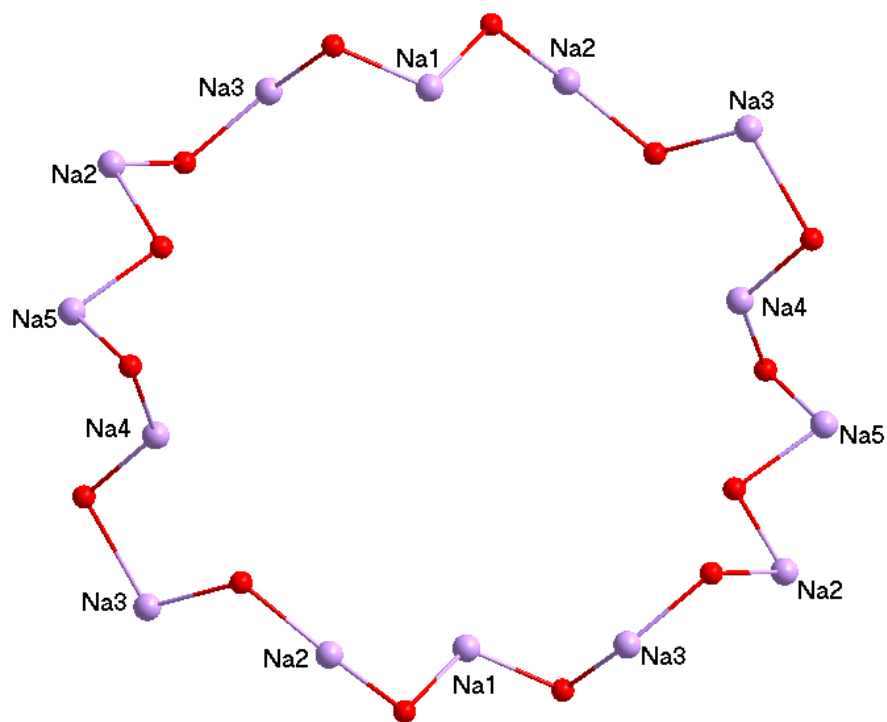

Fig. S3. The aperture of 14-ring.

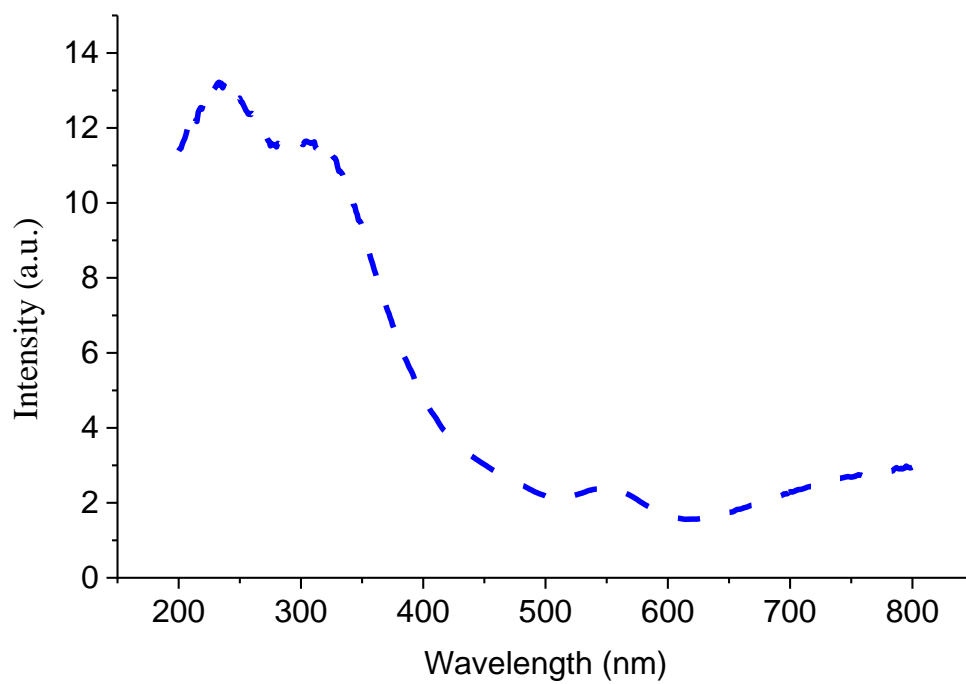

Fig. S4 UV-vis absorption spectrum of **1**.

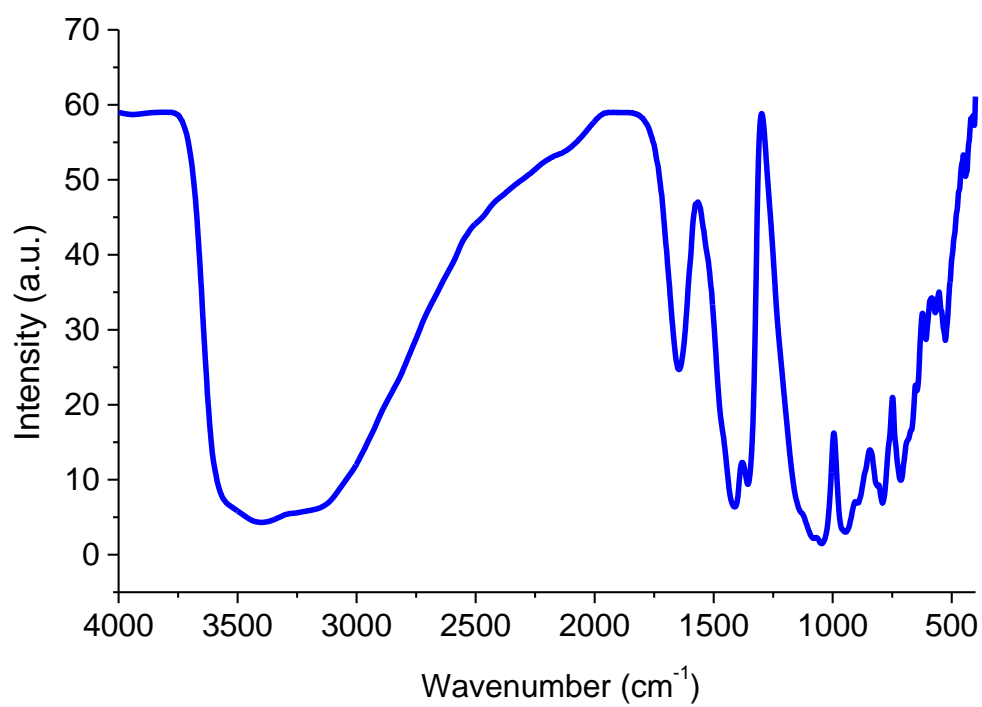

Fig. S5 IR spectrum of **1**.

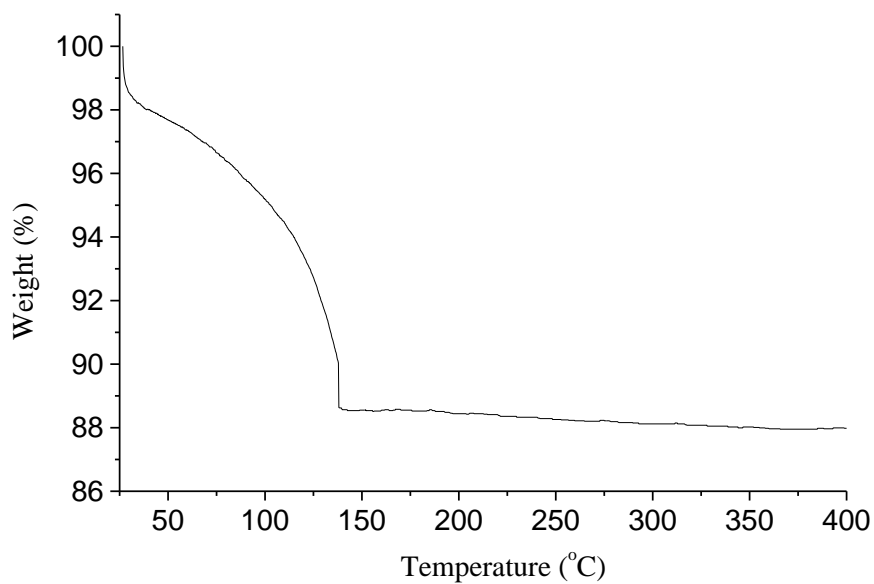

Fig. S6 TG curve of **1**.

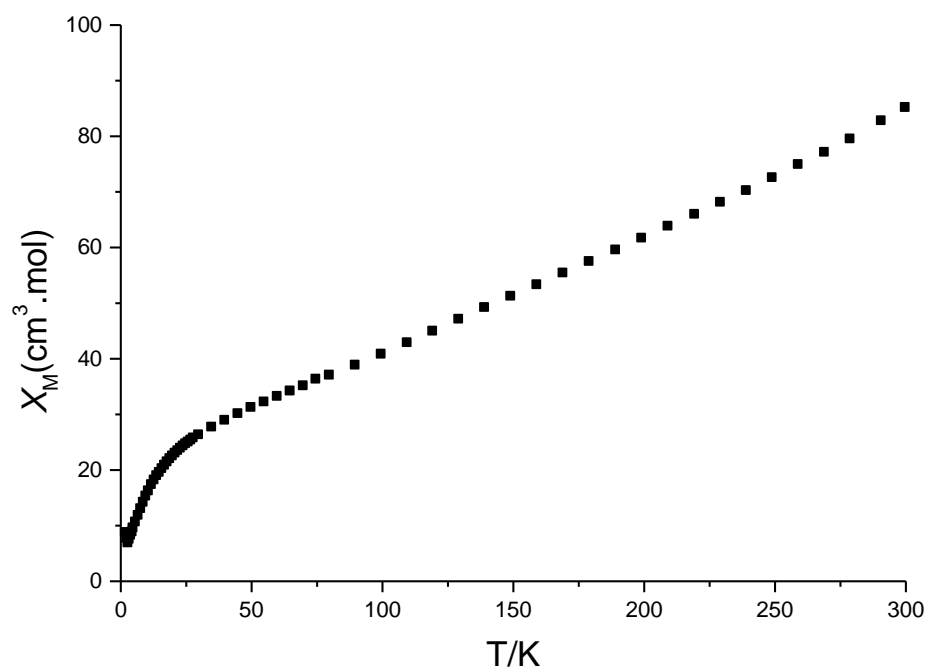

Figure S7 The plot of  $\chi_M^{-1}$  versus T for **1**.
